# Supplementary material
Source: publisher figshare collection journal article supplement (https://acs.figshare.com/ndownloader/files/14954393)
Supplement: Supplementary file 1 [file 14954393]

# Supporting Information

## Carbon nanotube and asbestos induced DNA and RNA methylation changes in bronchial epithelial cells

*Esra Emerce<sup>†, §</sup>, Manosij Ghosh<sup>†</sup>, Deniz Öner<sup>†</sup>, Radu - Corneliu Duca<sup>†</sup>, Jeroen Vanoirbeek<sup>†</sup>, Bram Bekaert<sup>‡, ¥</sup>, Peter H.M. Hoet<sup>†</sup>, Lode Godderis<sup>†, #, \*</sup>*

<sup>†</sup>KU Leuven, Department of Public Health and Primary Care, Unit of Environment and Health, 3000 Leuven, Belgium

<sup>§</sup>Gazi University, Faculty of Pharmacy, Department of Toxicology, Ankara, Turkey

<sup>‡</sup> KU Leuven - University of Leuven, Forensic Biomedical Sciences, Department of Imaging & Pathology, Leuven, Belgium

<sup>¥</sup> University Hospitals Leuven, Department of Forensic Medicine, Laboratory of Forensic Genetics and Molecular Archaeology, Leuven, Belgium

<sup>#</sup>Idewe, External Service for Prevention and Protection at Work, B-3001, Leuven, Belgium

### Corresponding Author

\*Lode Godderis: e-mail: lode.godderis@kuleuven.be

Supporting Information:

Figure S1: Schematic presentation of primer sequence for *CDKN1A* (Figure S1 A), *ATM* (Figure S1 B), and *TRAF2* (Figure S1 C) genes sequence (summarized in Table 3 of the manuscript), and their chromosomal locations, transcripts and regulatory build.

CDKN1A

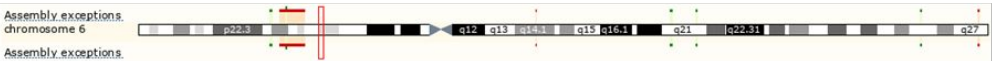

Chromosome 6: 36,648,429-36,648,466

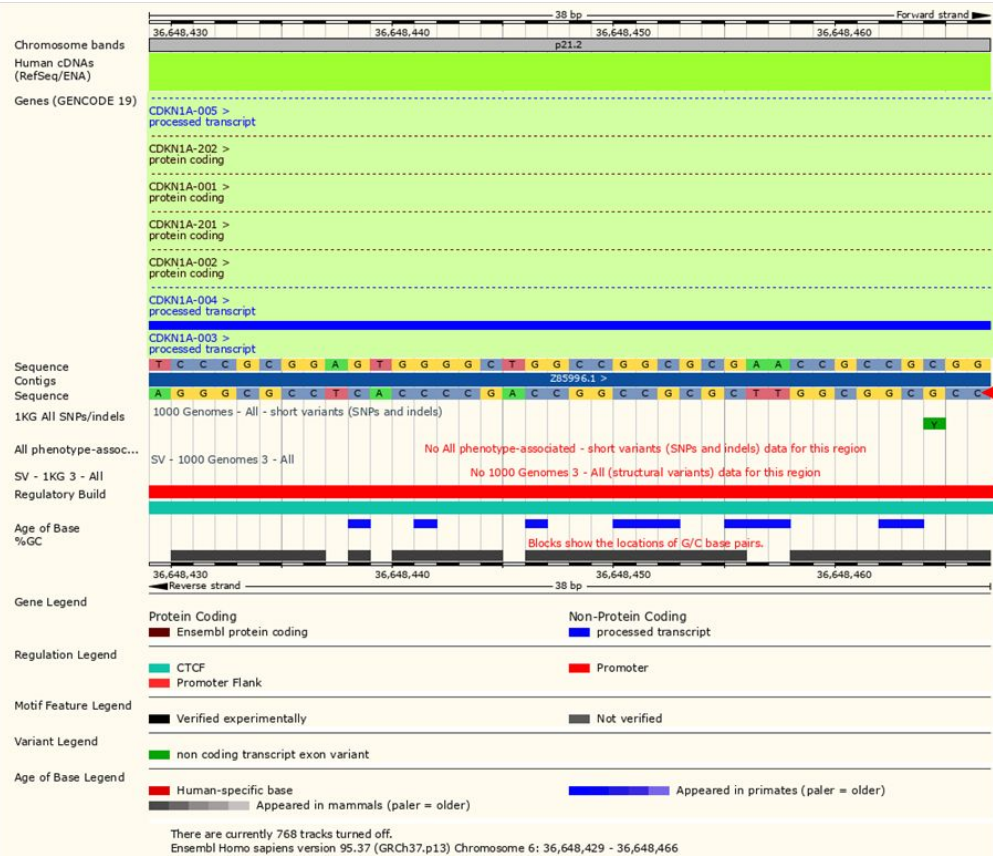

Sequence to Analyze

Figure S1 A

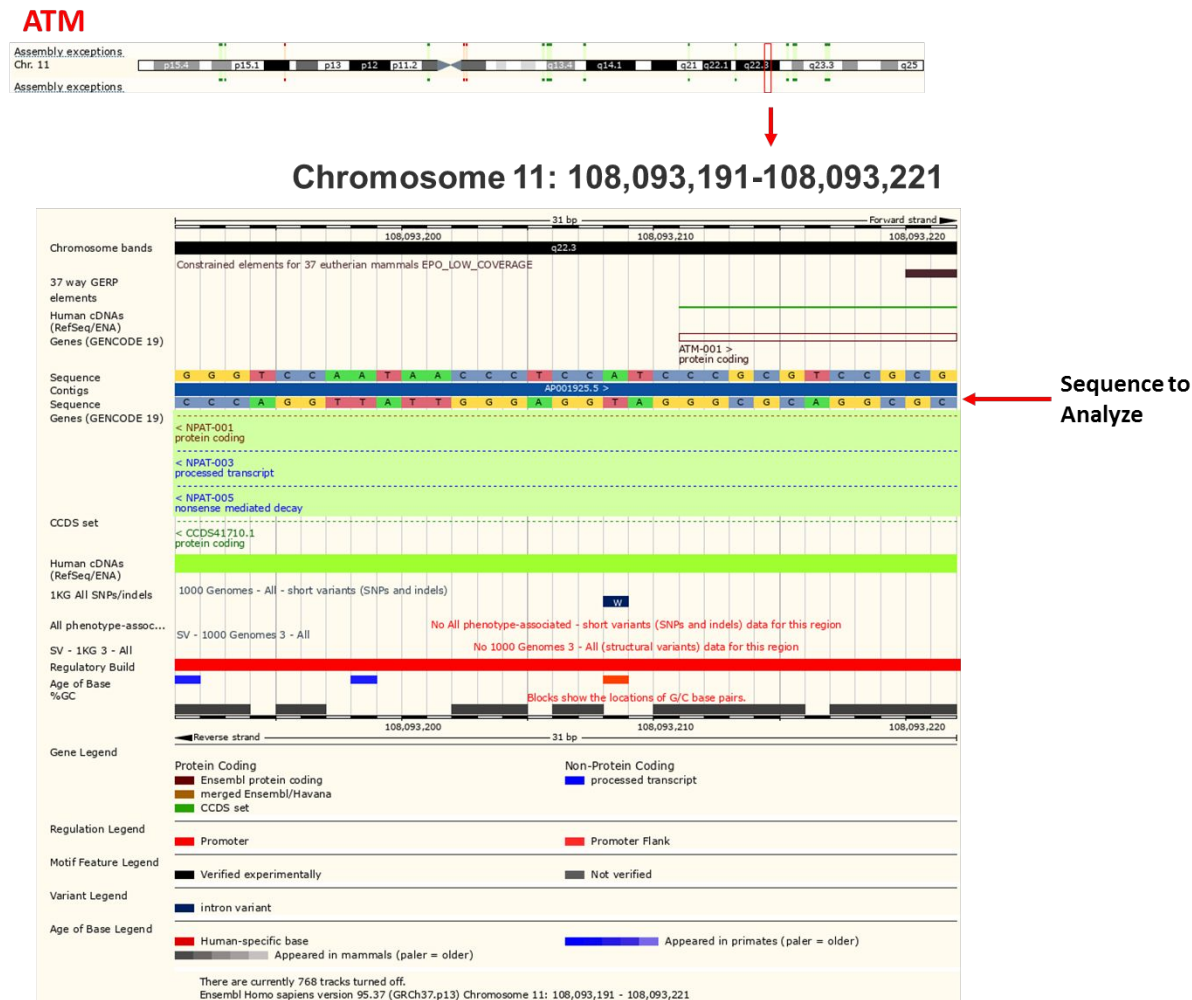

Figure S1 B

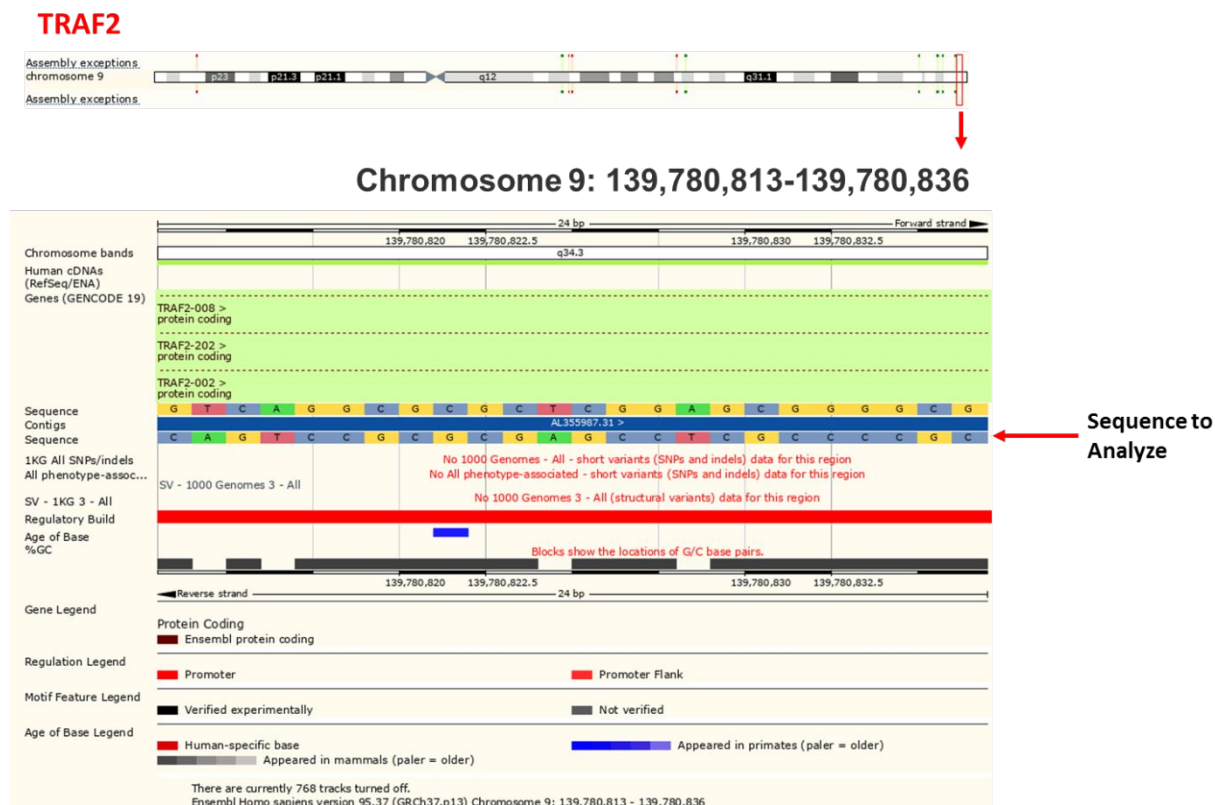

Figure S1 C
